# Supplementary material for: Mechanistic insights into glycosylation-driven structural rearrangements in human aquaporin 1
Source: Royal Society of Chemistry journal article supplement (doi:10.1039/d5cp01753j), 2025-01-01
Supplement: d5cp01753j1.pdf [file d5cp01753j1.pdf]

## Supporting Information

# Mechanistic Insights into Glycosylation-Driven Structural Rearrangements in Human Aquaporin 1

Keisuke Saito <sup>1,2\*</sup>, Yasuhiro Kajihara <sup>3\*</sup>, and Hiroshi Ishikita <sup>1,2\*</sup>

1) Department of Applied Chemistry, The University of Tokyo, 7-3-1 Hongo, Bunkyo-ku, Tokyo 113-8654, Japan

2) Research Center for Advanced Science and Technology, The University of Tokyo, 4-6-1 Komaba, Meguro-ku, Tokyo 153-8904, Japan

3) Department of Chemistry, Osaka University, 1-1 Machikaneyama, Toyonaka, 560-0043, Japan

\*CORRESPONDING AUTHOR:

Ishikita, **E-mail:** [hiro@appchem.t.u-tokyo.ac.jp](mailto:hiro@appchem.t.u-tokyo.ac.jp)

Saito, **E-mail:** [ksaito@appchem.t.u-tokyo.ac.jp](mailto:ksaito@appchem.t.u-tokyo.ac.jp)

Kajihara, **E-mail:** [kajihara@chem.sci.osaka-u.ac.jp](mailto:kajihara@chem.sci.osaka-u.ac.jp)

+glycan

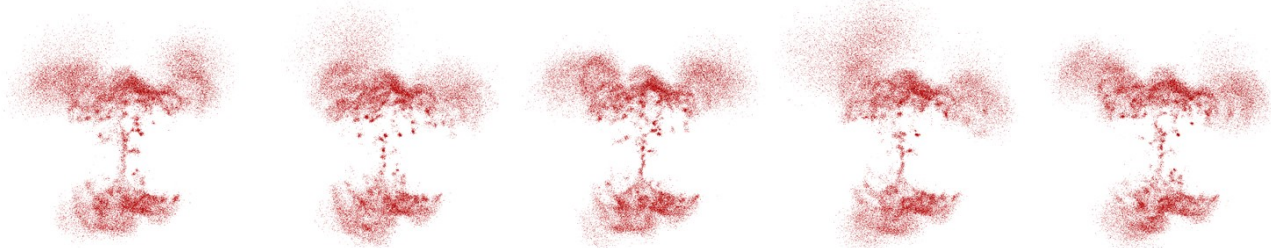

-glycan

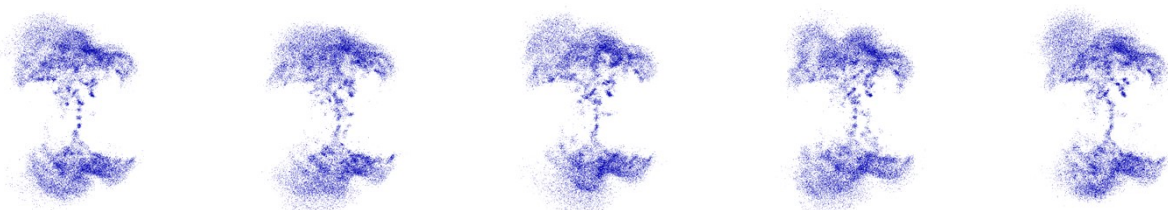

**Figure S1.** Water molecule distributions within 3.2 Å of the protein and glycan surfaces for each of the five individual MD trajectories. Each panel represents a separate MD trajectory. Top panels: glycosylated AQP1. Bottom panels: non-glycosylated AQP1. Red and blue dots represent accumulated positions of water molecules, respectively.

+glycan

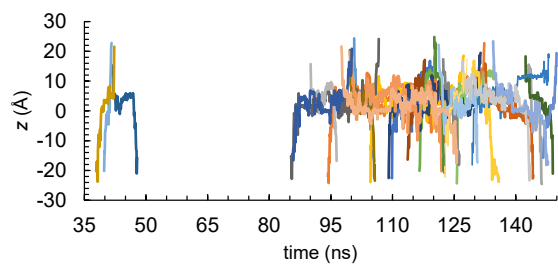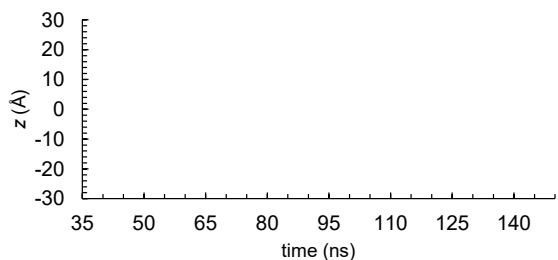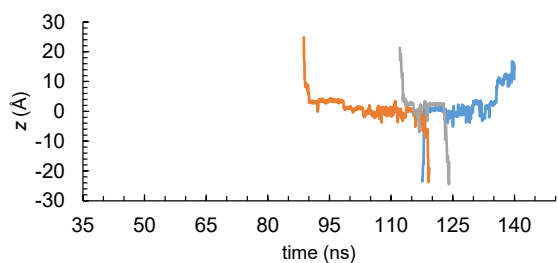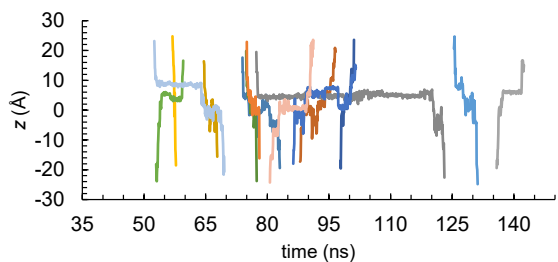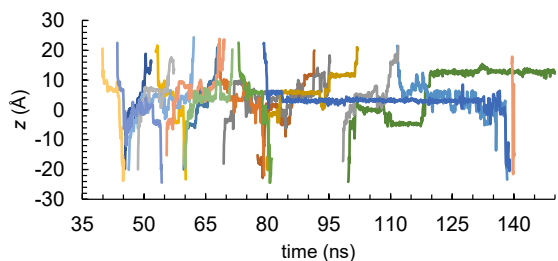

-glycan

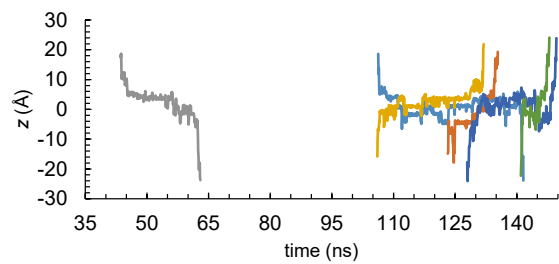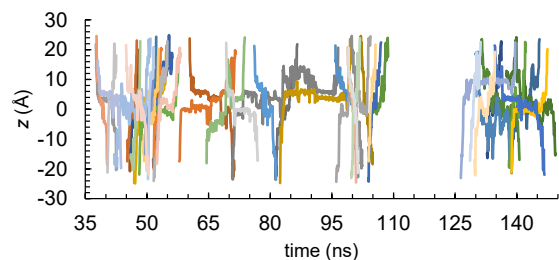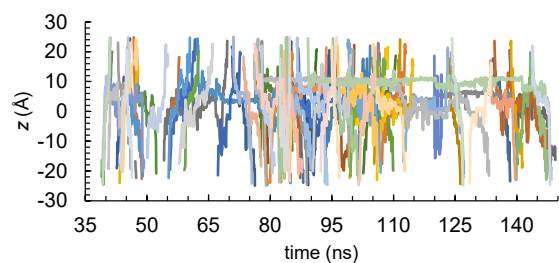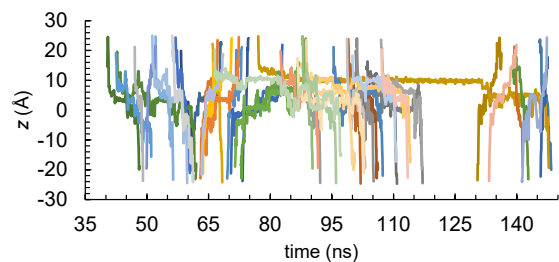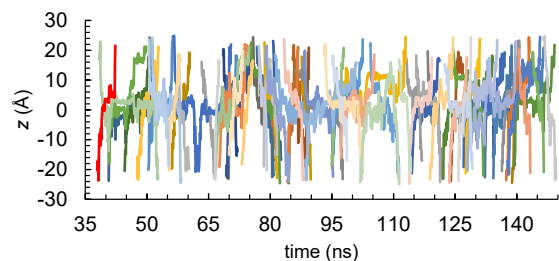

**Figure S2.** MD trajectories along the  $z$ -axis of oxygen atoms of water molecules that permeate the channel. Each panel represents a separate MD trajectory. Left panels: glycosylated AQP1. Right panels: non-glycosylated AQP1. Each line corresponds to the trajectory of an individual permeating water molecule.

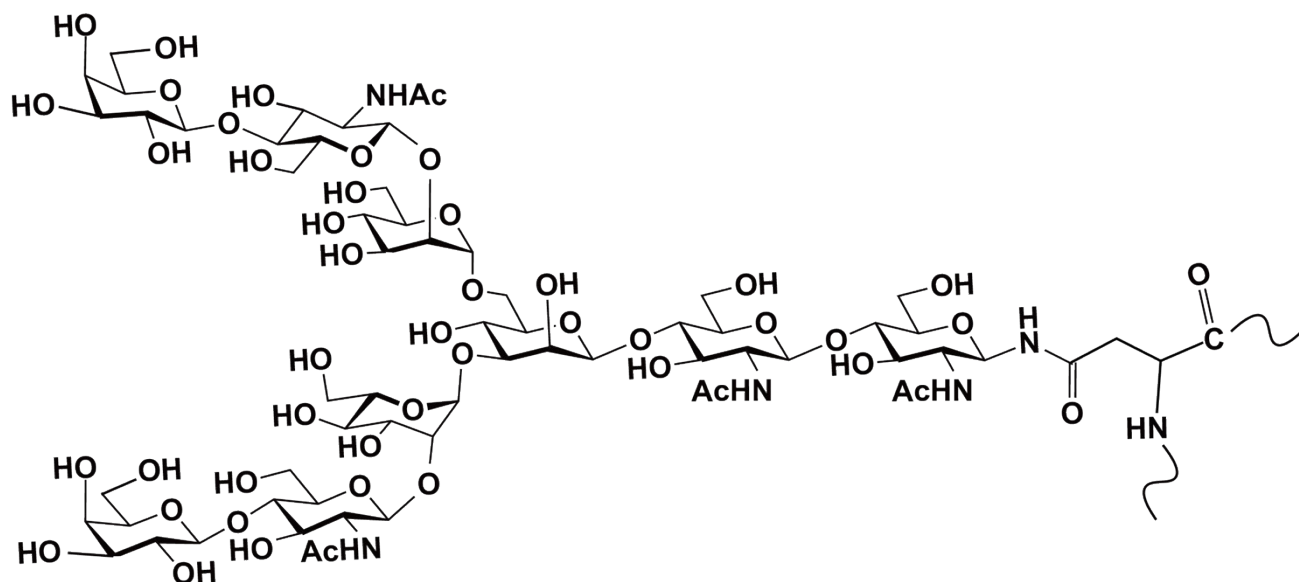

Gal- $\beta$ -1,4-GlcNAc- $\alpha$ -1,2-Man- $\alpha$ -1,6-  
 Gal- $\beta$ -1,4-GlcNAc- $\alpha$ -1,2-Man- $\alpha$ -1,3-  
 Man- $\beta$ -1,4-GlcNAc- $\beta$ -1,4-GlcNAc- $\beta$ -Asparagine

Gal: D-Galactoside; GlcNAc: N-acetyl-D-glucosamine; Man: D-Mannoside

**Figure S3.** Structure of the N-linked glycan modeled at Asn42 and Asn205 in AQP1.
